# Supplementary material for: Identification of Drought-Resistant Genes in Shanlan Upland Rice
Source: MDPI journal article supplement (doi:10.3390/agriculture12020150), 2022-01-21
Supplement: s1 [file s1]

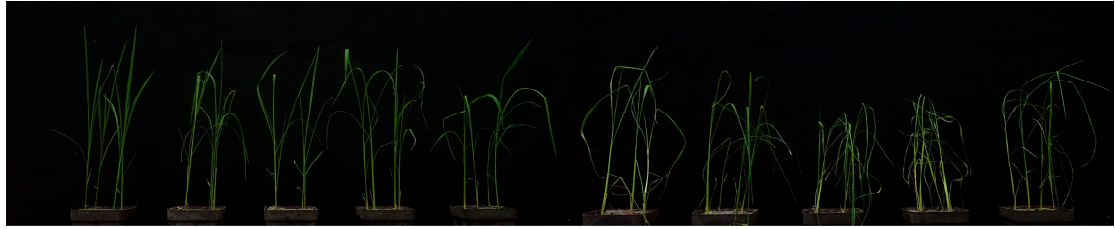

**Figure S1.** Leaf-rolling degree of 10 Shanlan upland rice varieties after 21 days of drought. From left to right are BSN, MPX, Changshan-Manuo, C36-13, Wanling1, Wanling4, Wanling8, ManPozi, Changmaogu10 and Zinuo.
