# Supplementary material for: Identification of Drought-Resistant Genes in Shanlan Upland Rice
Source: MDPI journal article supplement (doi:10.3390/agriculture12020150), 2022-01-21
Supplement: s1 [file s1]

**Table S1.** qRT-PCR primer design information

| Gene_ID/Name        | Forward primer(5'-3') | Reverse primer(5'-3') |
|---------------------|-----------------------|-----------------------|
| <i>Os11g0115100</i> | TCAGGAACCTCAACATGGGC  | CTTGGAGCAGTCGACGGAG   |
| <i>Os04g0415800</i> | CAGGAACGCCGGGATCAA    | GTAATCTCCGCACTTGTAGCC |
| <i>Os04g0493600</i> | ATGGTGGCTCTGGTGTTTCG  | CACAGTACCCCCATTGGCTG  |
| <i>OsLEA3-2</i>     | CCAAGAACAAGCTGGGCGAG  | CTTGAACTCCGTCGCCTTCT  |
| <i>RePRP2.2</i>     | AATGGACGCGTGATTGAAGC  | GAGGGTTAGGCTGTGGACTG  |
| <i>RAB21</i>        | GCTCCAGCTCAAGCTCGTC   | CATGGCATGCTGCTGCTC    |
| <i>Os01g0192900</i> | ATCTACTCCGGCTCCGTCTT  | GGCTGTAGACGATGTGGACG  |
| <i>Os09g0351700</i> | TCTCGAACAGCAACCTGCAT  | GGATGGAATTGTCCCGCTCA  |
| <i>Os07g0251900</i> | CTTCGCTCGGGAACCTAACA  | TGAGGTAGAGTGACCGGAGG  |
| <i>Os06g0210900</i> | GCCGGACAGAAATTCTCCCA  | AGAGCTGCGTGGTAAATGCT  |
| <i>Os01g0910800</i> | TGGCGCAGTACTACTCGGA   | GCCGGTGCAGGAGTCGTA    |
| <i>Os10g0505900</i> | ACGTGCAGAACGACCCAAT   | ATCTTGTCGGTGTACGTCGC  |
| <i>Os11g0291475</i> | GAGGAGGTTTCGGTTGGGAC  | AAGGCAACCCCGTCTACAAG  |
| <i>Os01g0705200</i> | GTACGATGCCAAGGACAGGG  | CCAATGTAGCTCCCGGTCTG  |
| <i>Os05g0381400</i> | GCTGCTGGTGCTGAATCTGA  | TCTCGCCGTTGATGTAGTGG  |
| <i>OsActin</i>      | TGGCATCTCTCAGCACATTCC | TGCACAATGGATGGGCCAGA  |
